# Supplementary material for: Electrostatic and short-range interactions compete in directing the structure of p-tert-butylcalix[4]arene inclusion compounds of fluorinated benzenesElectronic supplementary information (ESI) available: X-ray details. See http://www.rsc.org/suppdata/cc/b4/b401269k/
Source: Royal Society of Chemistry journal article supplement (doi:10.1039/b401269k), 2004-01-01
Supplement: b401269k.doc [file b401269k.doc]

Supplemental Material:

Electrostatic and short-range interactions compete in directing the structure of *p-tert*-butylcalix[4]arene inclusion compounds of fluorinated benzenes

Gary D. Enright, Konstantin A. Udachin, and John A. Ripmeester*

Steacie Institute for Molecular Sciences, National Research Council of Canada, 100 Sussex Drive, Ottawa, Ontario, Canada K1A 0R6. Fax: +1 613 998 7833; Tel:+1 613 993-2011 E-mail: [John.Ripmeester@NRC.CA](mailto:John.Ripmeester@NRC.CA)

The structural analysis of *t*-butylcalix[4]arene inclusion compounds is often complicated by guest disorder and space group ambiguities. The most common guest disorder arises from the overlap of symmetry-related guest sites.

Except where noted the SHELXTL suite of programs1 was used for the data solving and refinement. When necessary, guest disorder was modeled with a rigid group approximation, with the C atoms forming a regular hexagon with a C-C bond distance of 1.39 Å. The C-F bond distance was fixed at 1.33 Å and all the guest atoms were confined to be in a plane. For compounds **1** (at both 293 and 173 K), **2**, **3** and **5** the unit cells were close to metrically tetragonal, however all but **1** at 293 K were best described as monoclinic structures. For those structures that were solved as monoclinic it was necessary to check for pseudomerohedral twinning, either as a 90 rotation about the unique b axis (matrix I; 0 0 1 0 1 0 –1 0 0) or as a 180 rotation about the a+c direction (matrix II; 0 0 1 0 –1 0 1 0 0). **1** at 173K, was found to be twinned about the unique axis (matrix I, twin fraction of 0.358). **2** was found to be twinned about both axese. In this case the SHELXTL suite of programs1 was employed for initial refinement and CRYSTALS2 was employed for the final refinement cycles involving both twin matrices (matrix I, twin fraction 0.262; matrix II, twin fraction 0.066). **3** was found to be twinned about a+c (matrix II; twin fraction 0.180) and **5** was twinned about the unique axis (matrix I; twin fraction 0.334).

1. SHELXTL (Ver. 6.10), Bruker AXS Inc., Madison Wisconsin, USA (2000).
2. CRYSTALS (Ver. 12.1) Watkin, D.J. Prout, C.K., Carruthers, J.R., Betteridge, P.W., Cooper, R.I. (1999), CRYSTALS Issue 11. Chemical Crystallography Laboratory, University of Oxford, Oxford, UK.
